# Supplementary material
Source: publisher site journal article supplement (https://www.degruyterbrill.com/publication/isbn/9783110336351/downloadAsset/9783110336351_Inhaltsverzeichnis.pdf)
Supplement: Supplementary file 1 [file 9783110336351_Inhaltsverzeichnis.pdf]

# Inhaltsverzeichnis

## Vorwort — V

Ortwin Dally, Tonio Hölscher, Susanne Muth, Rolf Michael Schneider

### **Einführung: Historien – Historie – Geschichte: Wohin führen die Medien? — 1**

- 1 Die Herausforderung der Medien für die Geschichte — 1
- 2 Leistungen und Grenzen der ‚Medien der Geschichte‘ — 7
- 3 Das Spektrum der Medien — 12
- 4 Aus der Perspektive der Medien: Geschichten oder Geschichte? — 31

Hans-Joachim Gehrke

### **Historiographie: Die Gegenwart in der Geschichte — 37**

- 1 Tradition: Geschichte im Medium von Kunst — 37
- 2 Innovation: Der Einsatz der Historiographie — 43
- 3 Vergangenheit und Gegenwart in der griechischen Geschichtsschreibung — 47

Jonas Grethlein

### **Das homerische Epos als Quelle, Überrest und Monument — 54**

- 1 Homer als Medium von der Antike bis in die Gegenwart — 54
- 2 Homer als ‚Quelle‘ — 56
- 3 Homer als ‚Überrest‘ — 59
- 4 Homer als ‚Monument‘ — 62
- 5 Die Spatialität des epischen Erinnerns — 66

Renate Schlesier

### **Symposium, Kult und frühgriechische Dichtung: Sappho im Kontext — 74**

Edith Hall

### **Tragic Myth as Medium of Social and Cultural History:**

### **Black Sea Artemis and the Cults of the Roman Empire — 107**

Angelos Chaniotis

### **Mnemopoetik: Die epigraphische Konstruktion von Erinnerung**

### **in den griechischen Poleis — 132**

- 1 Epigraphisch überlieferte Texte als Medium der Erinnerung — 132
- 2 Epigraphische Texte sind das Ergebnis von Auswahl — 135
- 3 Epigraphische Texte sind *hypomnemata* — 137
- 4 Epigraphische Texte wurden als historische Zeugnisse verstanden — 139
- 5 Der Ort der epigraphischen Aufstellung ist Ort der Erinnerung — 143
- 6 Historische Erinnerung in epigraphischen Texten ist (auch) Erinnerung an Protagonisten und Familien — 147

- 7 Epigraphische Texte vermitteln eine selektive Version der Vergangenheit — 151
- 8 Epigraphische Texte erwecken Emotionen — 153
- 9 Ergebnisse — 158

Joseph Maran

**Urgeschichte – Frühgeschichte: Geschichte? Das Beispiel des mykenischen Griechenland — 170**

- 1 Gesellschaften ohne Geschichte? — 170
- 2 Das unterschätzte sozialgeschichtliche Potential materieller Kultur — 171
- 3 Die Entstehung der mykenischen Kultur aus der Auseinandersetzung mit dem minoischen Kreta — 172
- 4 Das Ende der mykenischen Kultur und die Erinnerung an die palatiale Vergangenheit — 176
- 5 Eine kulturelle Anthropologie der Antike — 183

Paul Zanker

**Bilder lesen ohne Texte — 190**

- 1 Endymion und Luna — 195
- 2 Dionysos und Ariadne — 199
- 3 Prospektive Hoffnung und respektive Erinnerung — 201

Luca Giuliani

**Mythen- versus Lebensbilder? Vom begrenzten Gebrauchswert einer beliebten Opposition — 204**

Andrew Stewart

**Two Notes on Greeks Bearing Arms: The Hoplites of the Chigi Jug and Gelon's Armed Aphrodite — 227**

- 1 The Warriors of the Chigi Jug — 227
- 2 Arsinoe-Aphrodite at Arms — 233
- 3 Conclusion: History as (Self-)Image — 240

Adolf H. Borbein

**Das Medium der künstlerischen Form.**

**Medium – künstlerische Form – Geschichte: Drei Begriffe und zugleich drei Problemfelder — 244**

- 1 Medium — 244
- 2 Kunst — 244
- 3 Geschichte — 246
- 4 Subjektives Interesse — 247
- 5 Form und Stil — 248

- 6 Form und Zeitgeist — 249
- 7 Usurpierte Form — 250

Tonio Hölscher

**Monumente der Geschichte – Geschichte als Monument? — 254**

- 1 Einleitung — 254
- 2 Definition: Monu-Mentalität — 256
- 3 Initiatoren, Botschaften und Rezipienten — 262
- 4 Die Praxis der Setzung öffentlicher Denkmäler — 266
- 5 Grundthemen der geschichtlichen Repräsentation — 273
- 6 Monumentale Geschichte — 279
- 7 Geschichtsbewusstsein? — 281

Susanne Muth

**Historische Dimensionen des gebauten Raumes – Das Forum Romanum als Fallbeispiel — 285**

- 1 Der gebaute Raum als plurimediales Produkt — 285
- 2 Die historische Interpretierbarkeit des gebauten Raumes — 290
- 3 Das Forum Romanum – Chancen und Herausforderungen der historischen Interpretation — 294
- 4 Die Komplexität der Geschichte – Plädoyer für eine differenziertere Sicht auf die historischen Dimensionen des gebauten Raumes — 320

Rudolf Preimesberger

**St. Peter in Rom: Medien und Gattungen seit 1506 — 330**

Karl-Joachim Hölkeskamp

**Raum – Präsenz – Performanz.**

**Prozessionen in politischen Kulturen der Vormoderne – Forschungen und Fortschritte — 359**

- 1 Konzepte und Kategorien — 359
- 2 Prozession als Performanz I: Botschaft(en) eines Mediums — 369
- 3 Prozession als Performanz II: Raum, Route und Richtung — 371
- 4 ‚Performative turn‘ meets ‚spatial turn‘ — 375

Alain Schnapp

**Im Schatten der Pyramiden — 396**

- 1 Die Dichter sind langlebiger als die Monumente — 396
- 2 Borges und der Schatten der Mauer — 400
- 3 Kafka und die Ansichten eines Vorarbeiters — 404

Ortwin Dally

**Bilder im Kopf. Archäologen und ihre Medien — 408**

- 1 Archäologen schaffen Bilder — **409**
- 2 Bilder prägen Archäologen — **418**
- 3 Die Rolle der Medien — **428**
